# Supplementary material for: Rational design and optimization of selenophenes with basic side chains as novel potent selective estrogen receptor modulators (SERMs) for breast cancer therapy
Source: Royal Society of Chemistry journal article supplement (doi:10.1039/c7md00163k), 2017-01-01

## Supplementary Information

for

### Rational Design and Optimization of Selenophenes with Basic Side Chains as Novel Potent Selective Estrogen Receptor Modulators (SERMs) for Breast Cancer Therapy

Junjie Luo<sup>†a</sup>, Zhiye Hu<sup>†a</sup>, Yuan Xiao<sup>a</sup>, Tongxin Yang<sup>a</sup>, Chune Dong<sup>a,c</sup>, Jian Huang<sup>b</sup>, Hai-  
Bing Zhou<sup>a,\*</sup>

#### Contents:

|                                                                                     |       |
|-------------------------------------------------------------------------------------|-------|
| PART I. Analytical techniques.....                                                  | S2    |
| PART II. <sup>1</sup> H NMR and <sup>13</sup> C NMR spectra of final compounds..... | S3-22 |

## **PART I. Analytical techniques**

$^1\text{H}$  NMR and  $^{13}\text{C}$  NMR spectra were recorded on a Bruker AVANCE III 400 spectrometer (400 MHz,  $^1\text{H}$  NMR; 101 MHz,  $^{13}\text{C}$  NMR) at room temperature. NMR spectra were calibrated to the solvent signals of  $\text{CDCl}_3$  ( $\delta$  7.26 and 77.00), Acetone- $d_6$  ( $\delta$  2.05 and 29.84, 206.26),  $\text{CD}_3\text{OD}$  ( $\delta$  3.31 and 49.00) or  $\text{DMSO-}d_6$  ( $\delta$  2.50 and 39.43). The chemical shifts are provided in ppm and the coupling constants in Hz. The following abbreviations for multiplicities are used: s, singlet; d, doublet; t, triplet; m, multiplet. Glassware was oven-dried, assembled while hot, and cooled under an inert atmosphere. Unless otherwise noted, all reactions were conducted in an atmosphere. Reaction progress was monitored using analytical thin-layer chromatography (TLC). Visualization was achieved by UV light (254 nm). Chromatography was performed with silica gel (0.040-0.063 mm) packing. High resolution mass spectra (HRMS) were measured on IonSpec 4.7 Tesla FTMS using MALDI/DHB. Melting points were obtained on X-4 melting point apparatus (Beijing TECH Instruments, Co., Ltd.) and are uncorrected.

## PART II. <sup>1</sup>H NMR and <sup>13</sup>C NMR Spectra of final compounds

9a

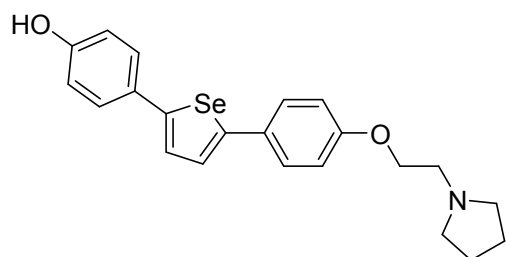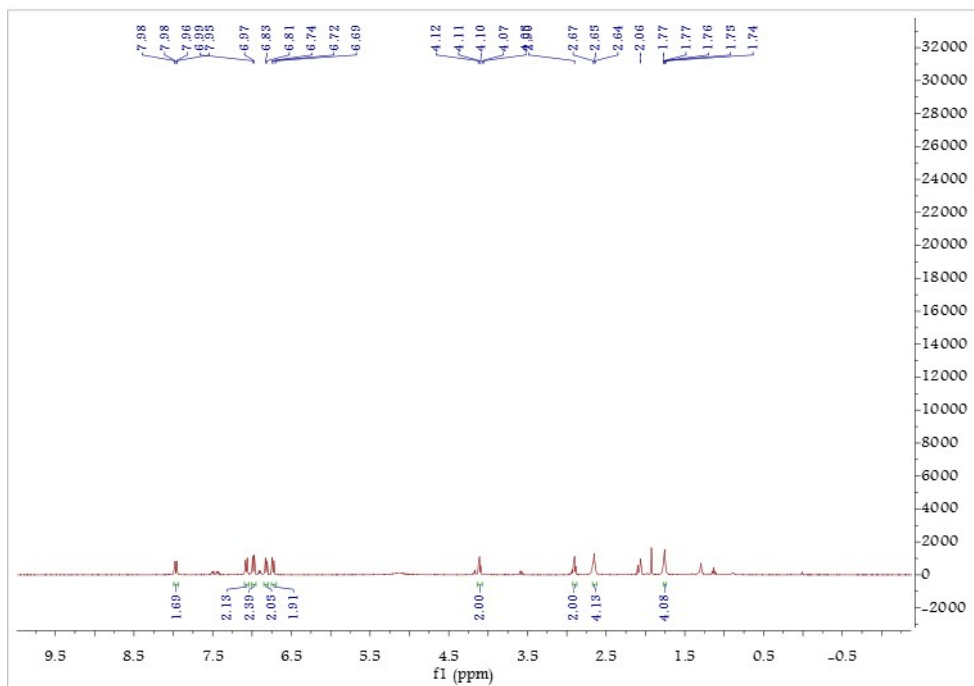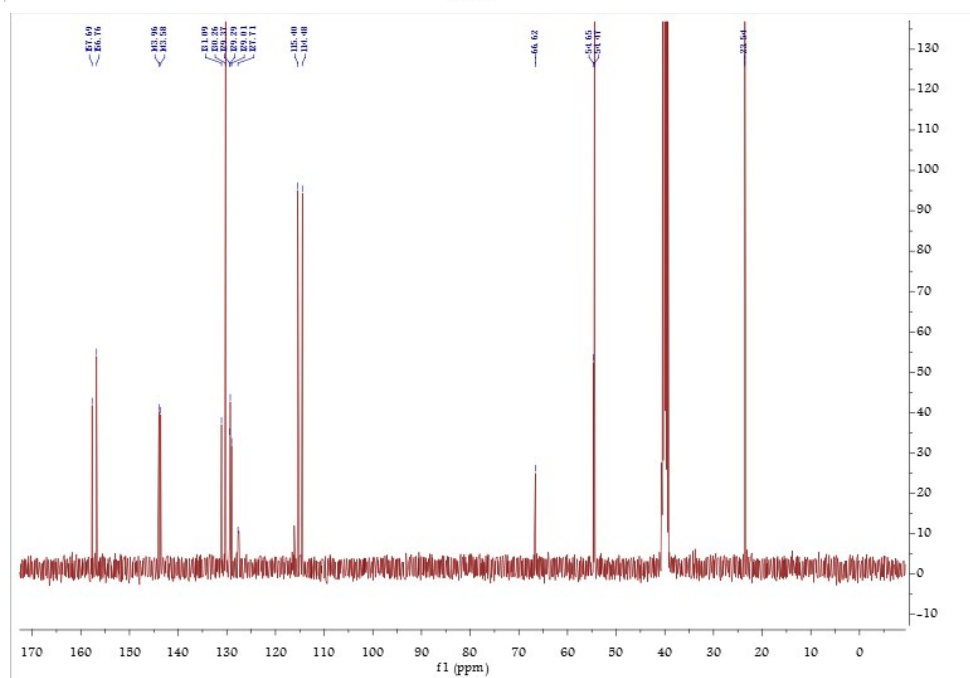

9b

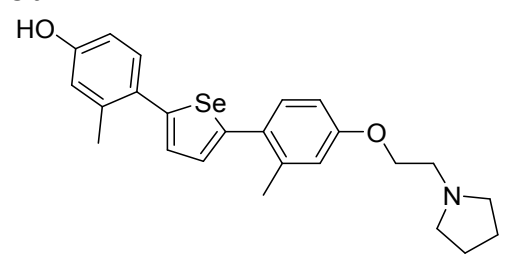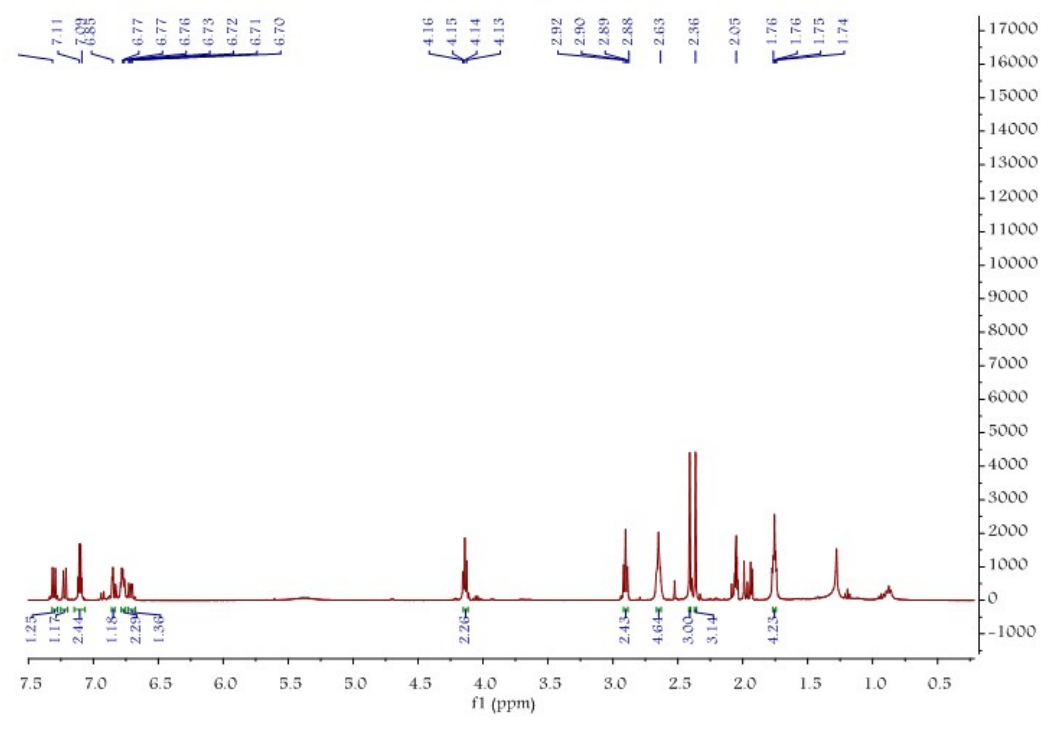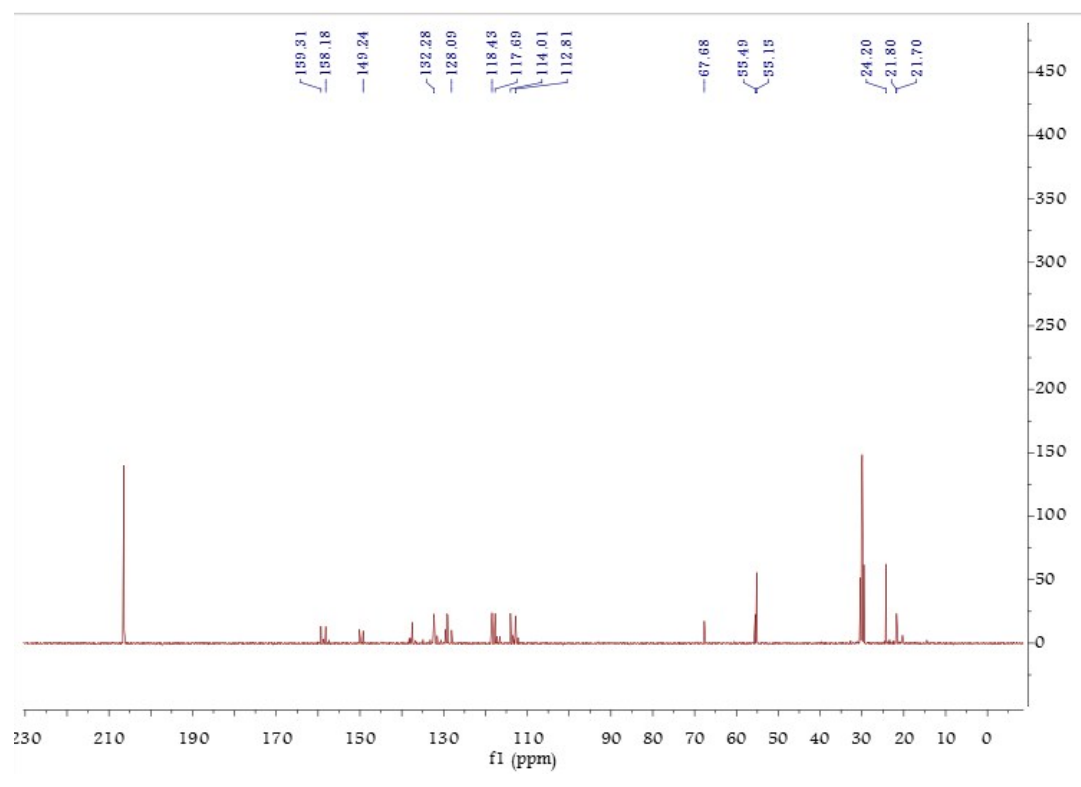

9c

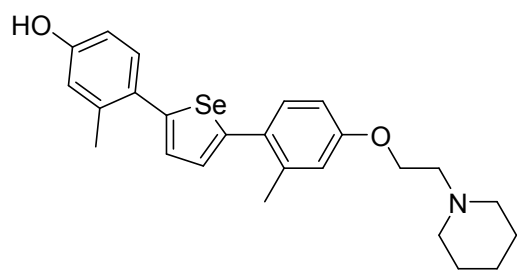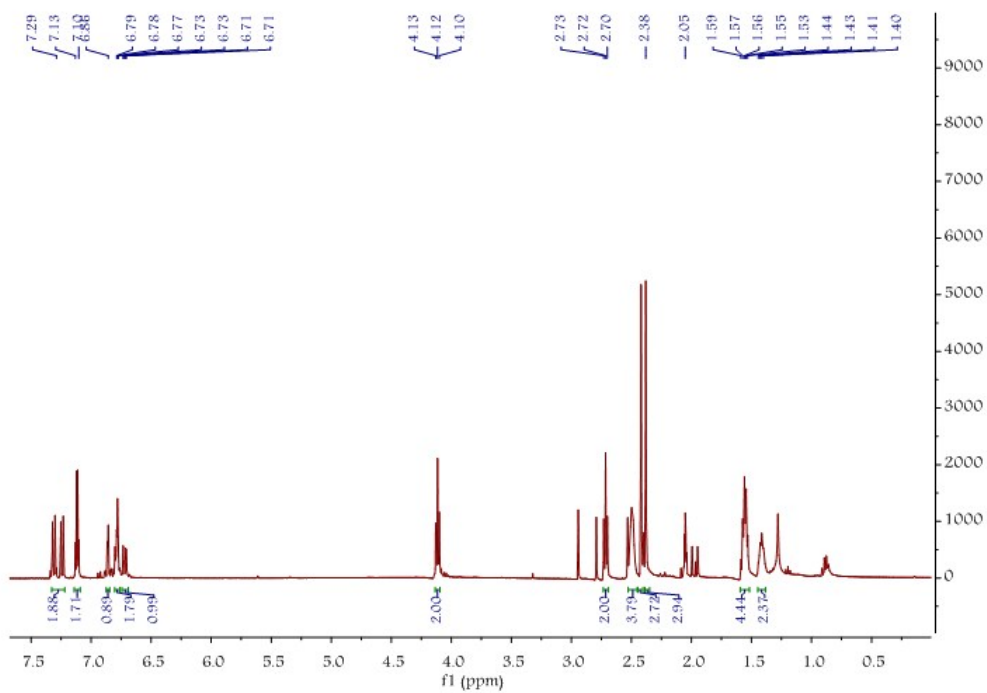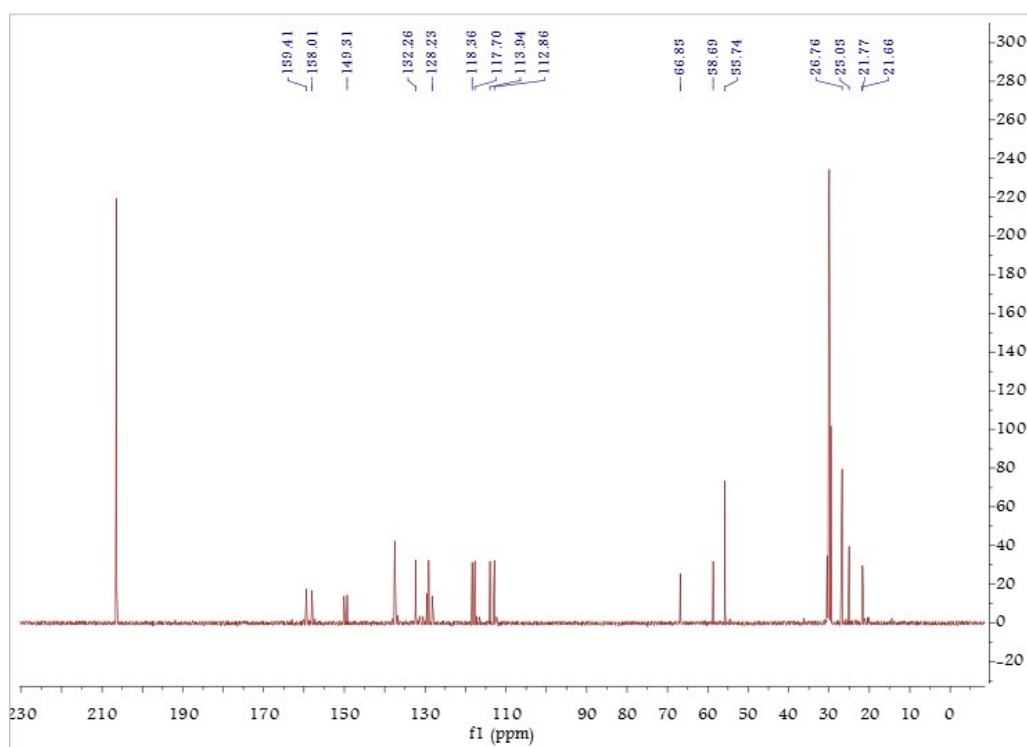

9d

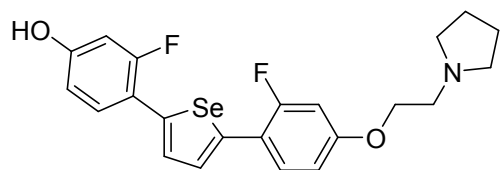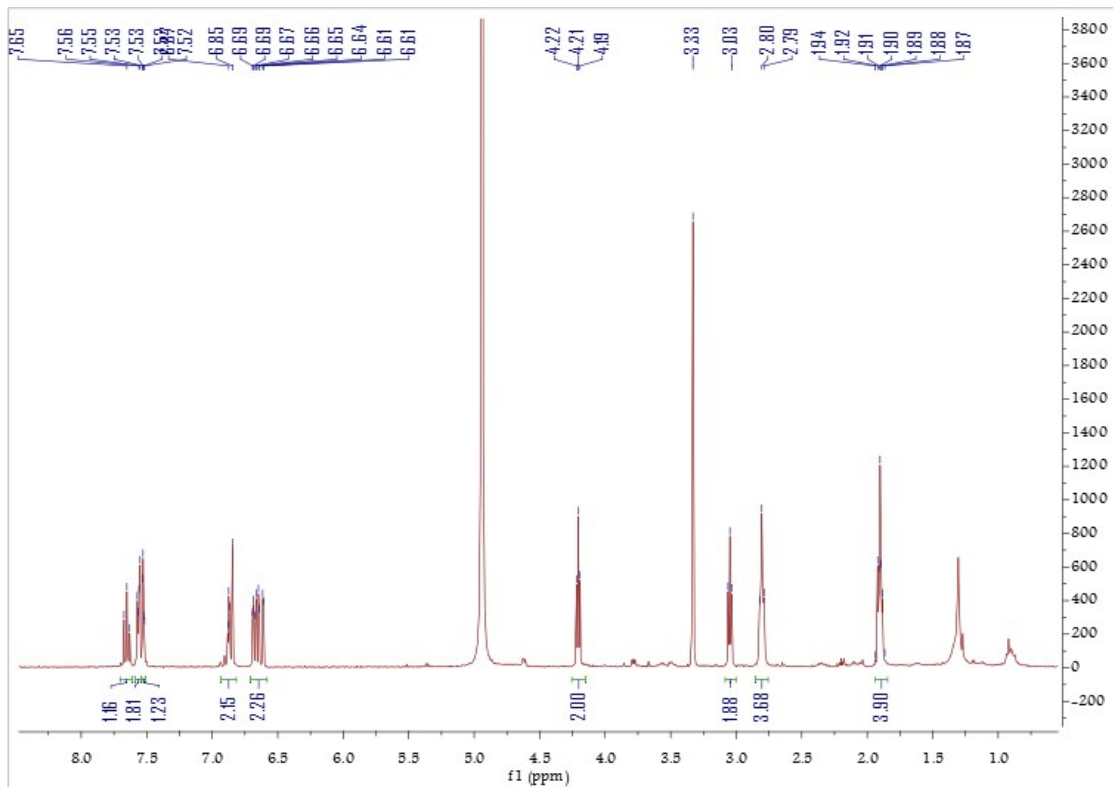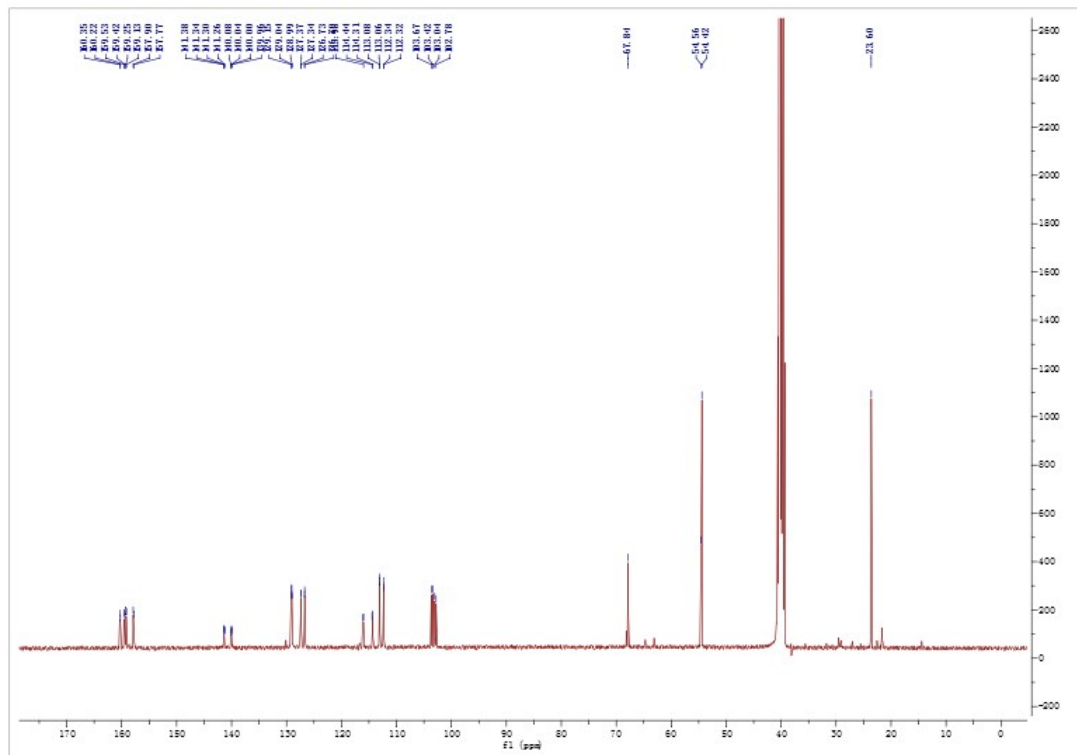

9e

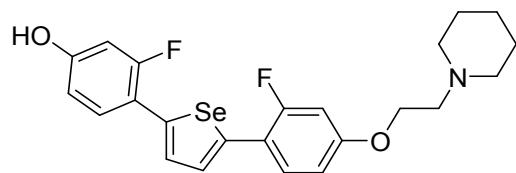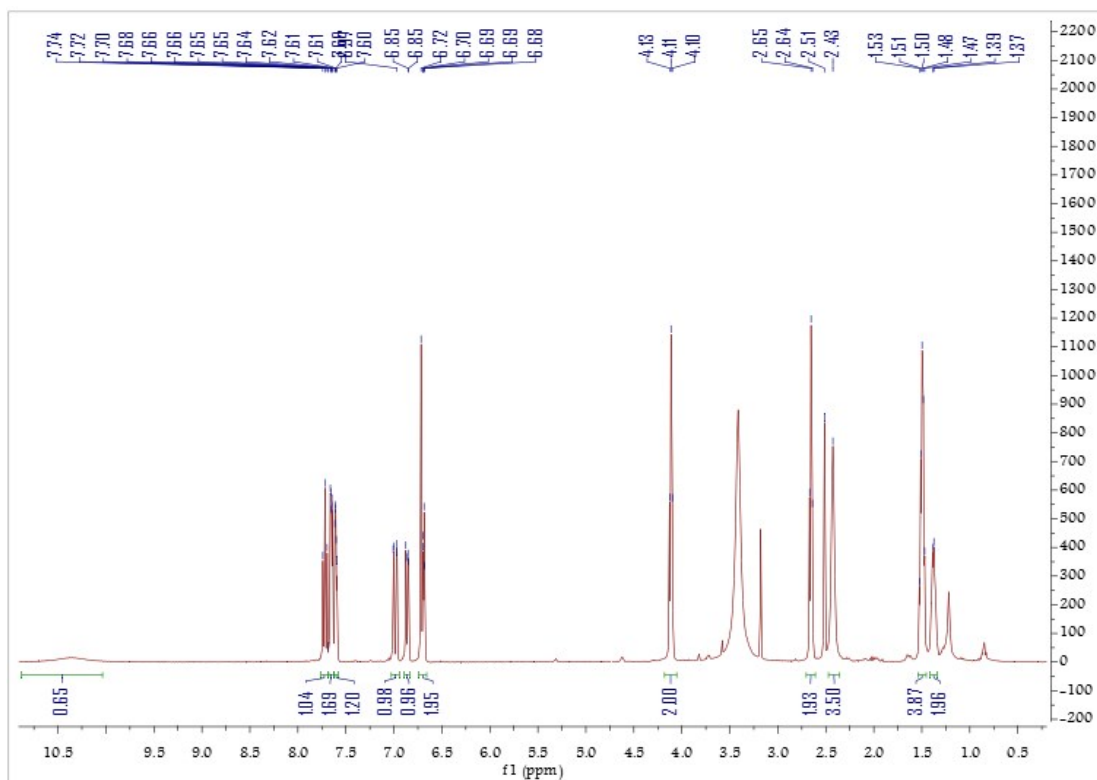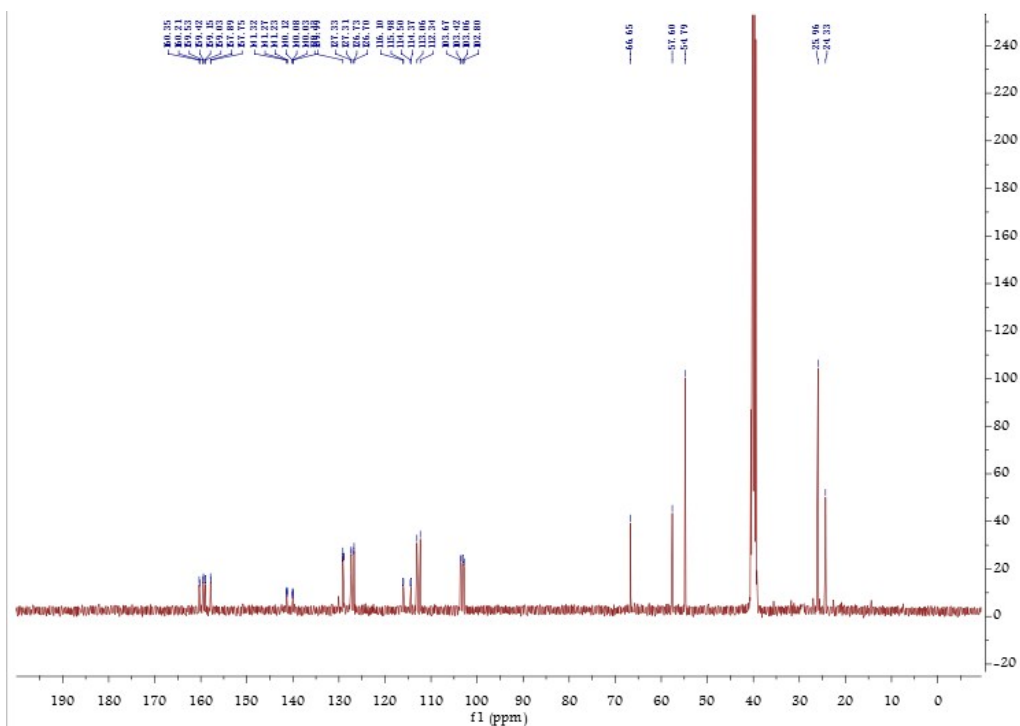

9f

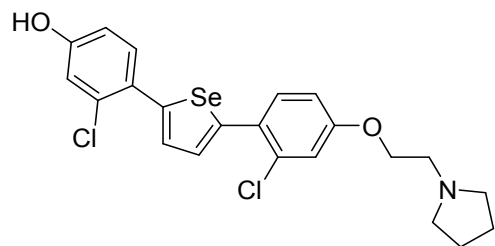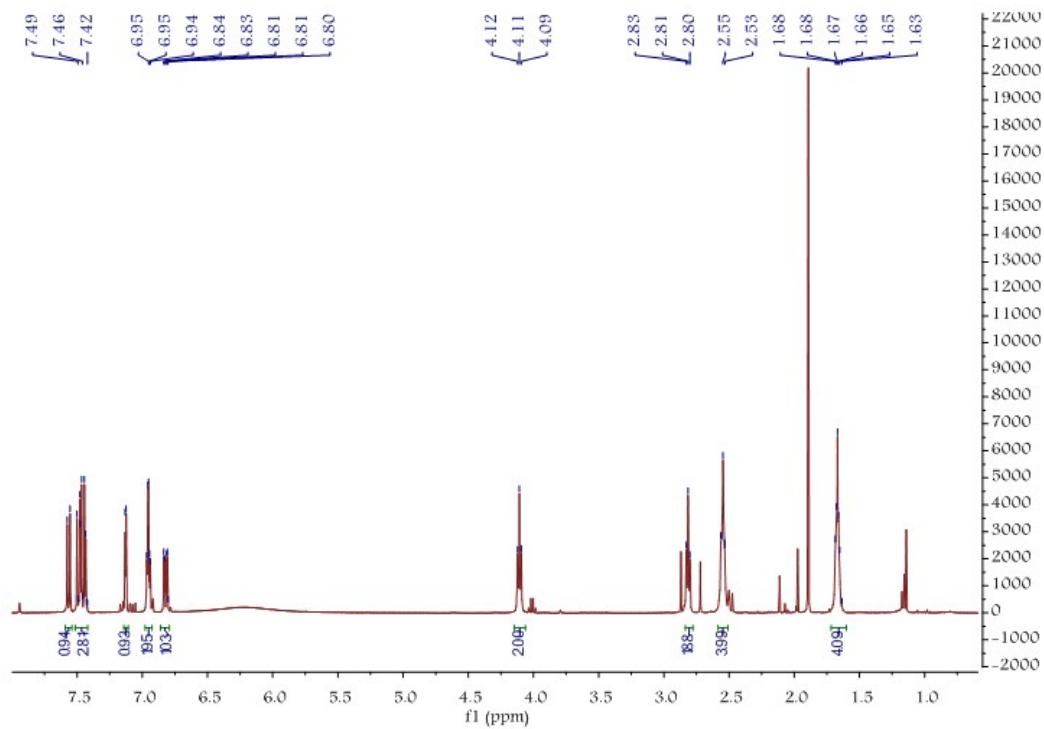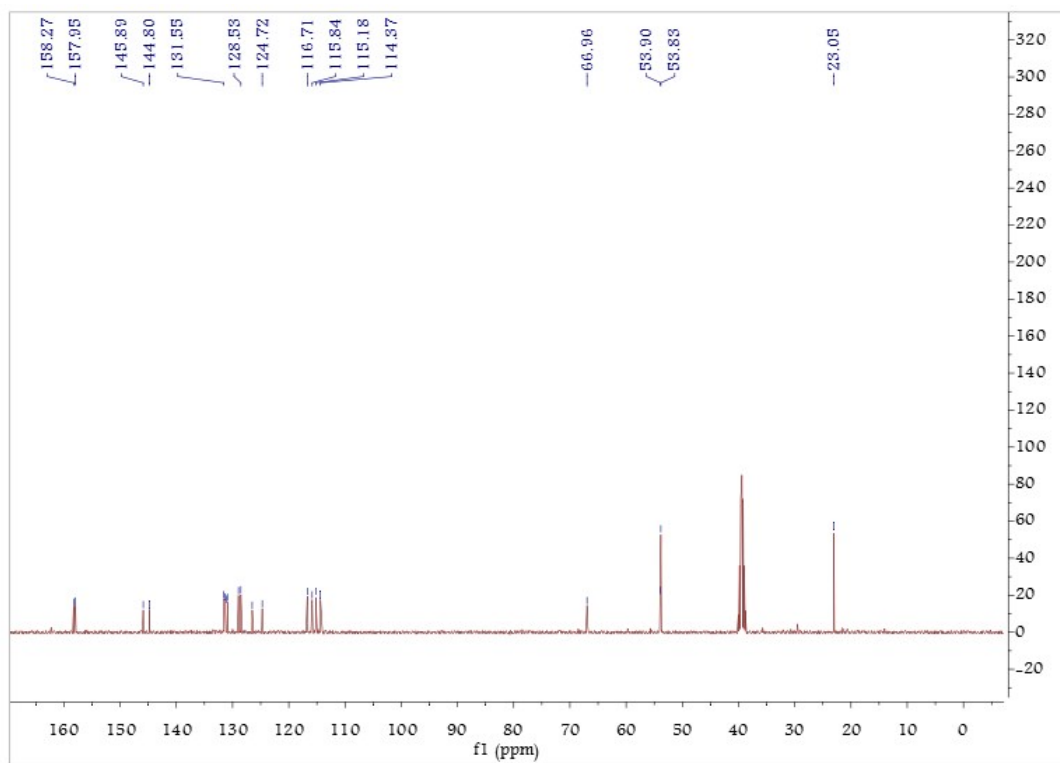



9g

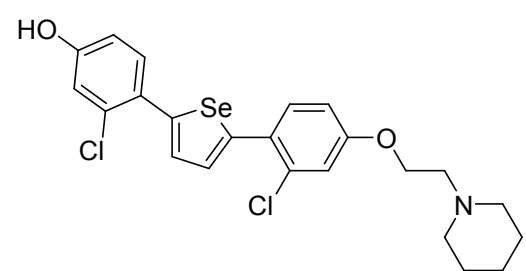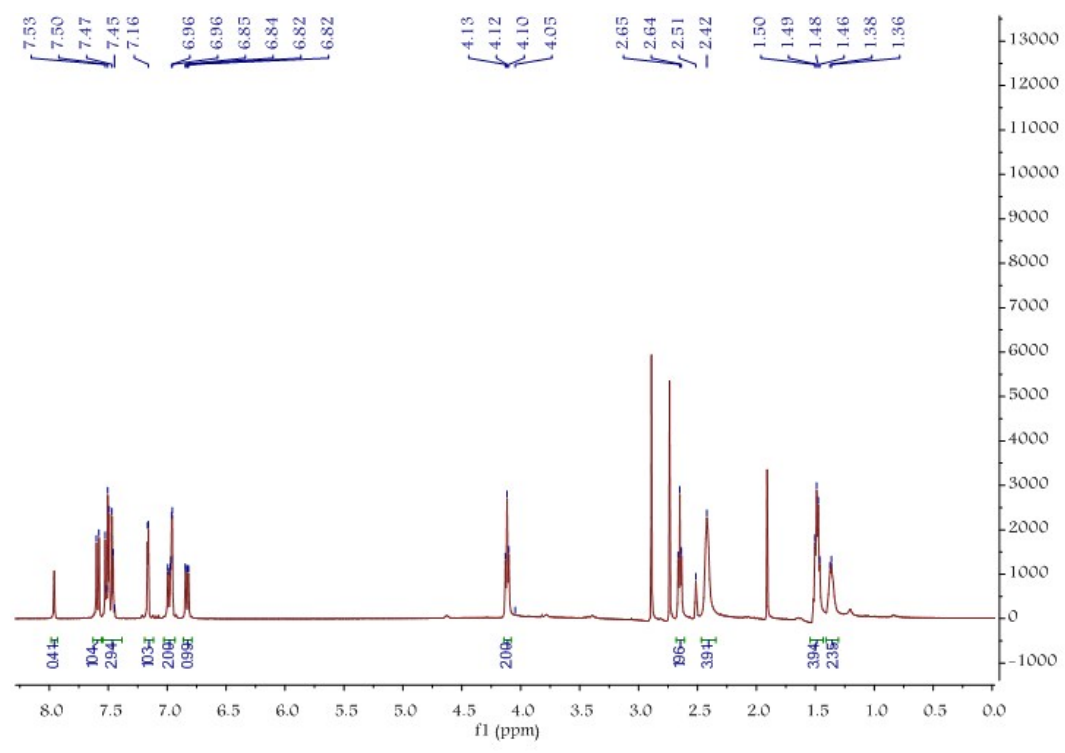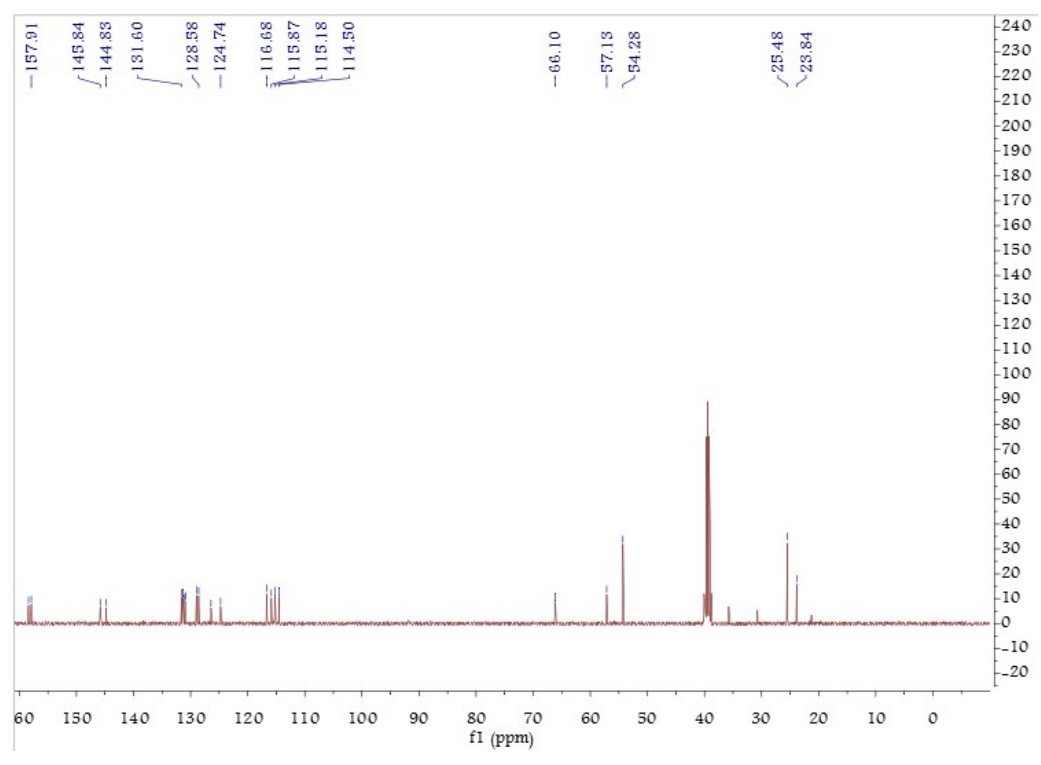

10e

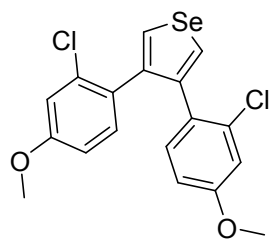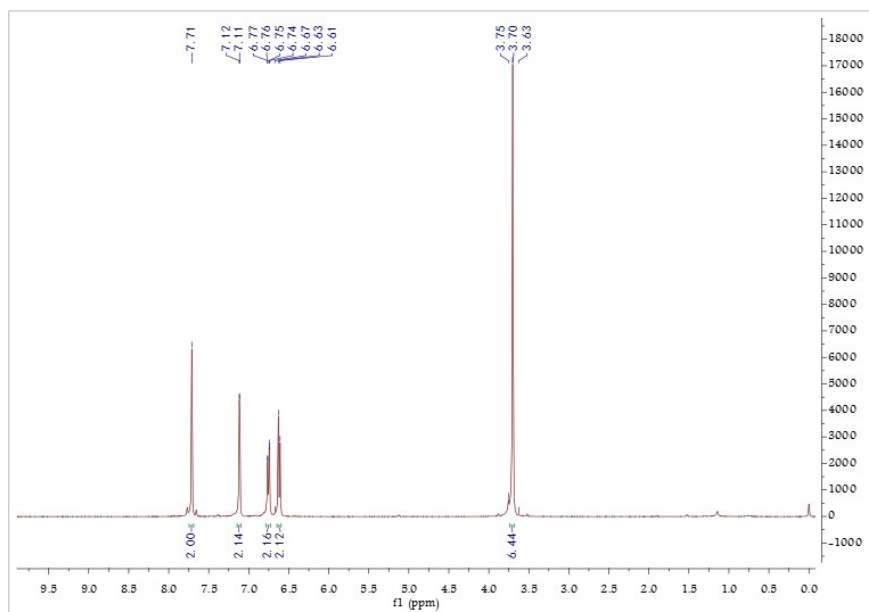

11e

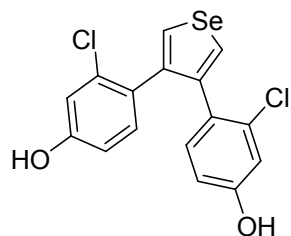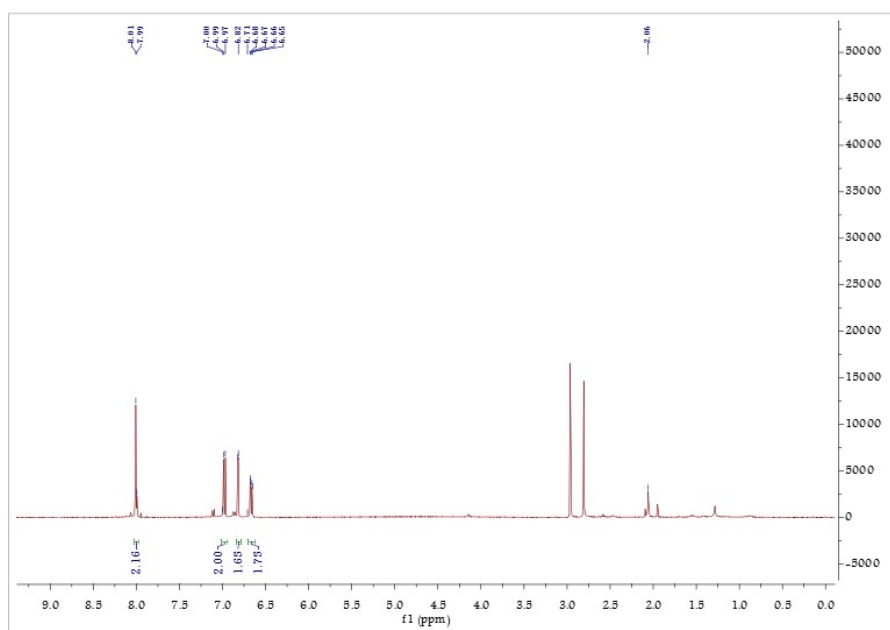

12a

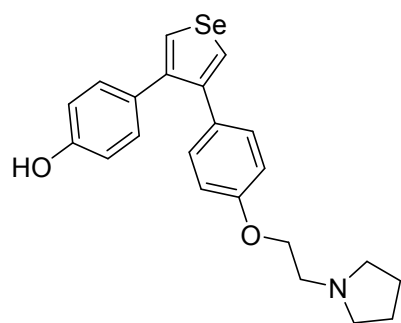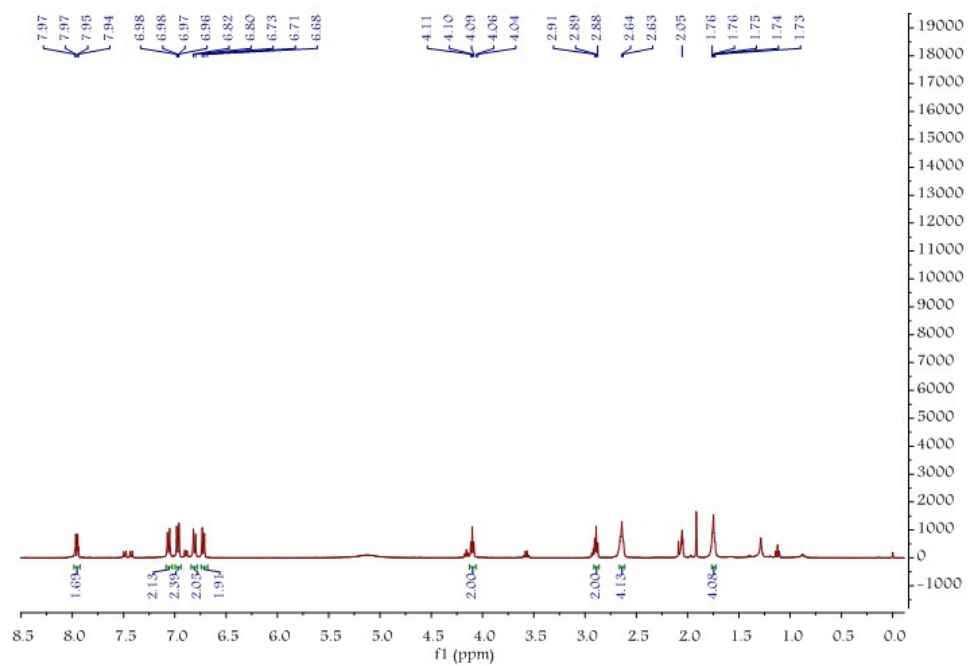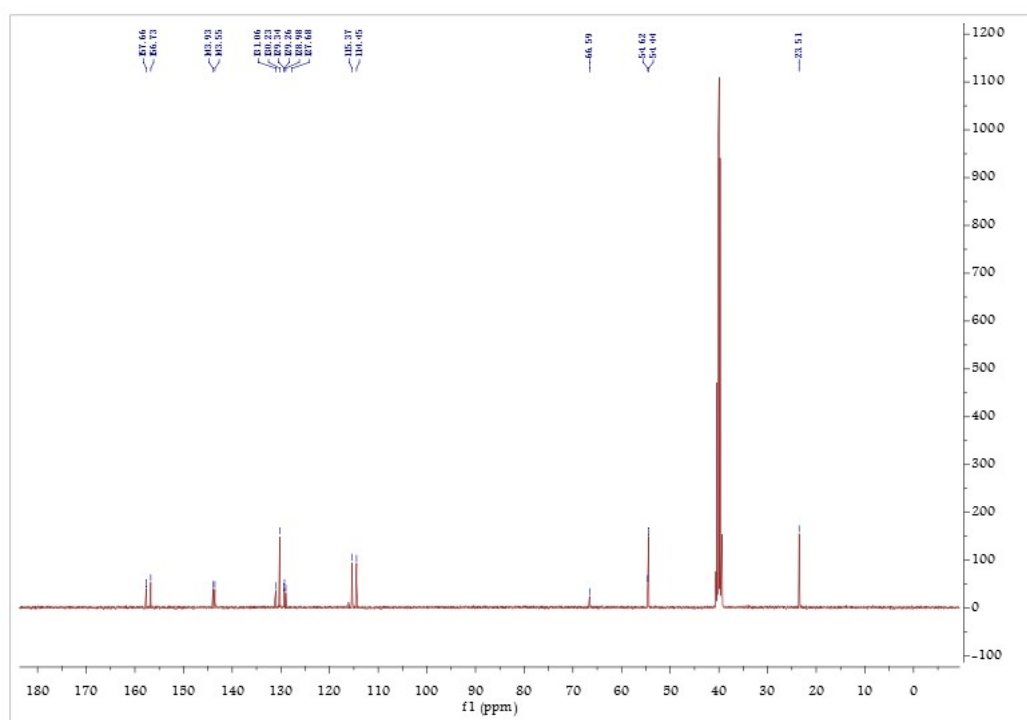

12b

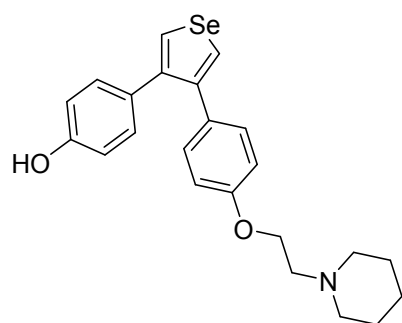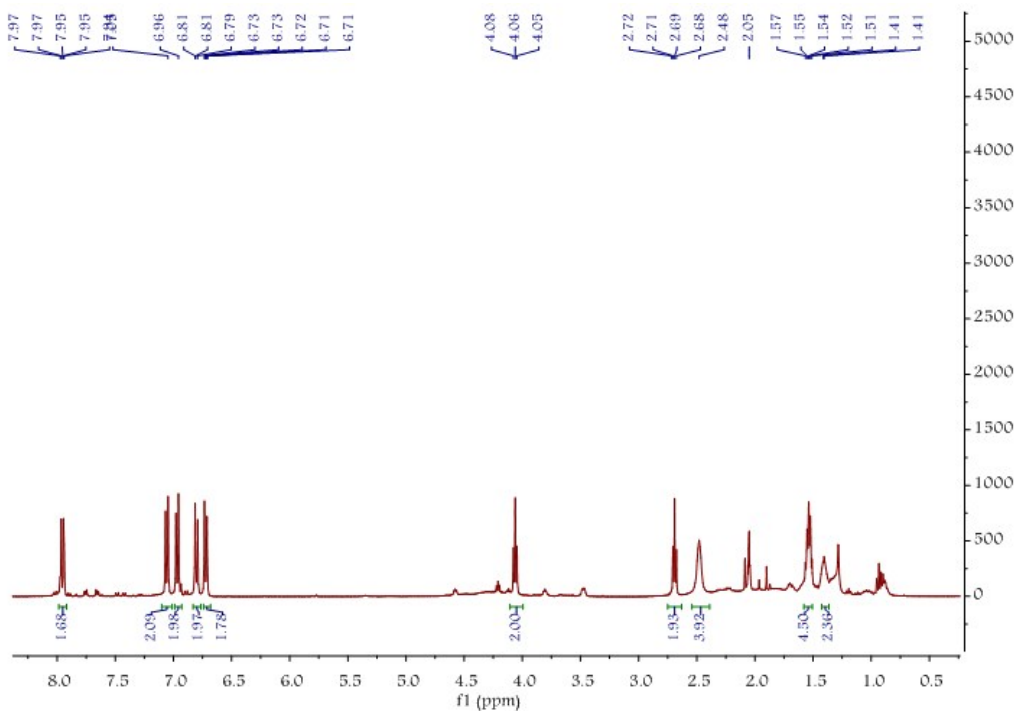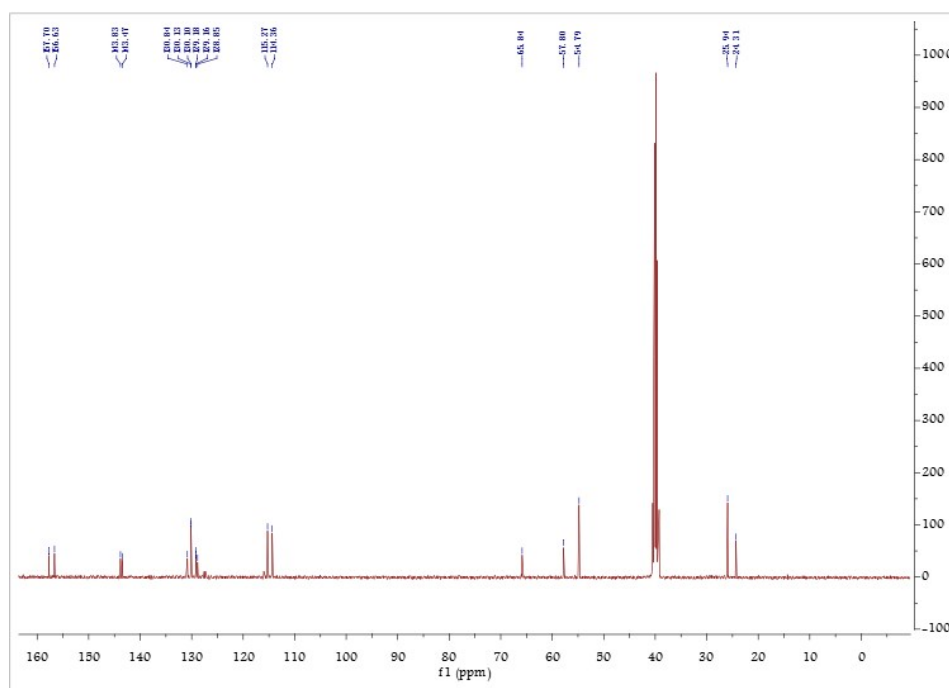

12c

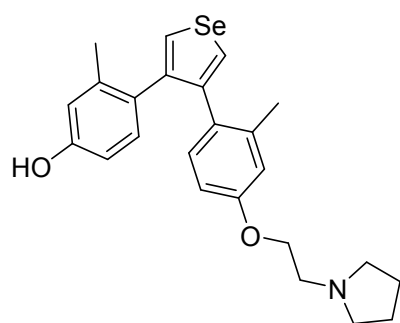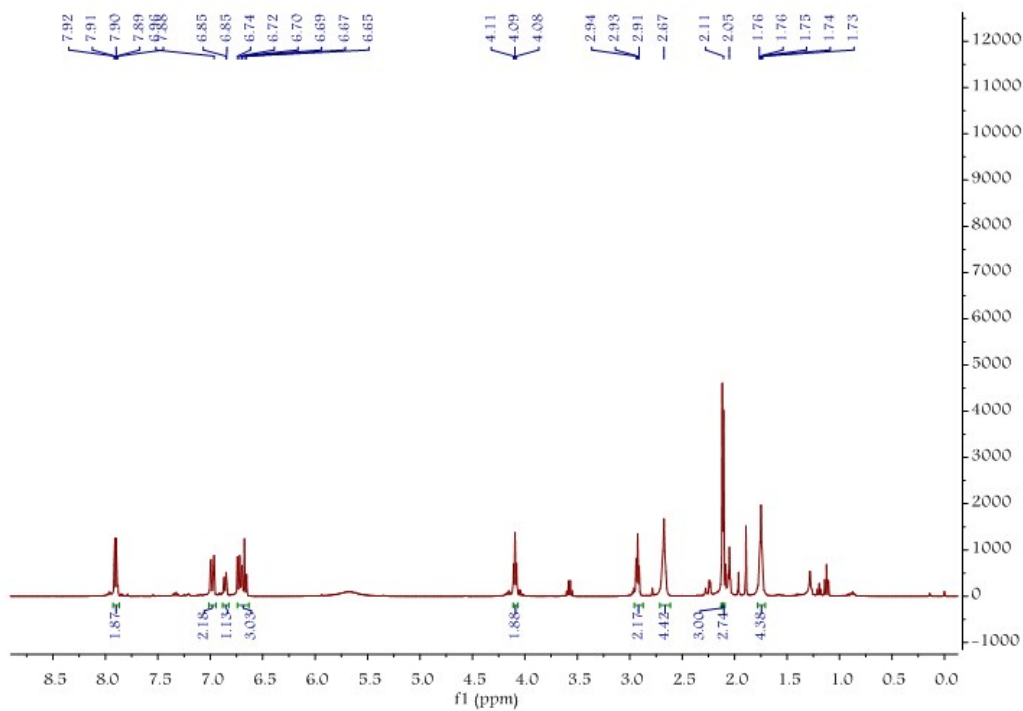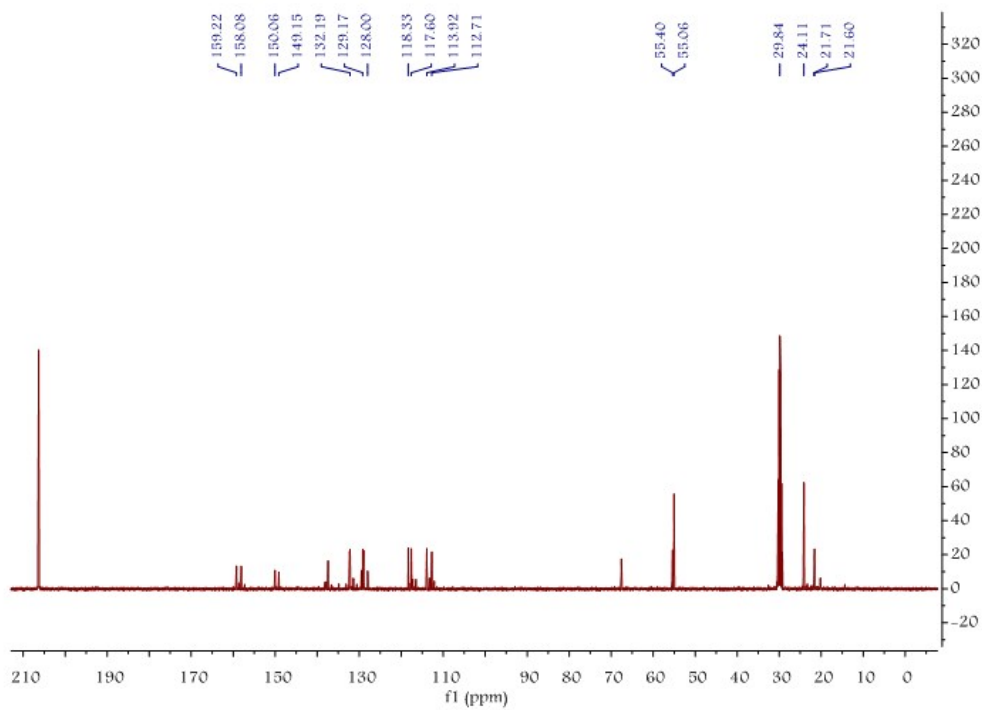

12d

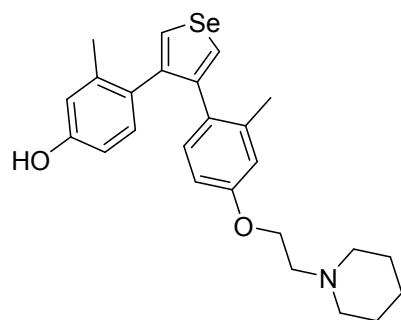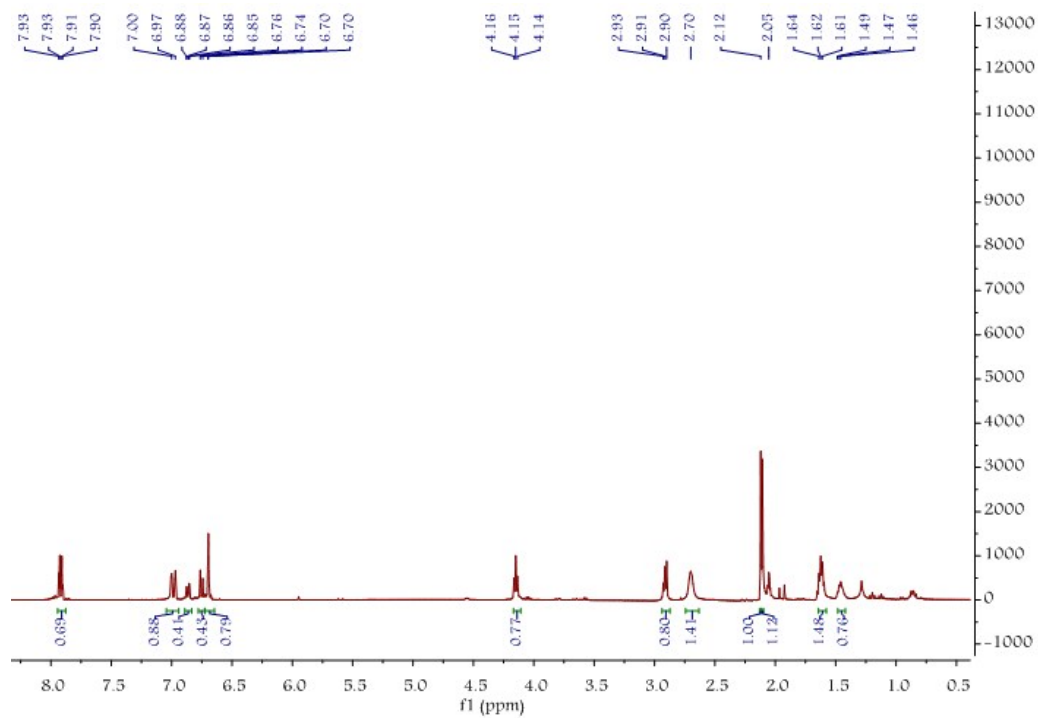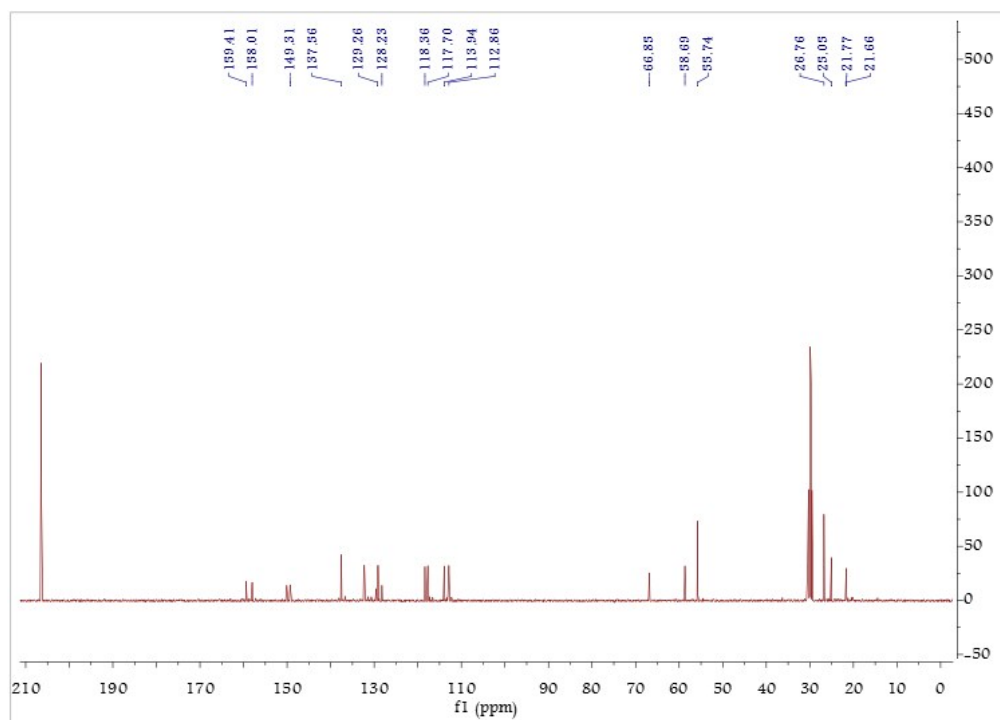

12e

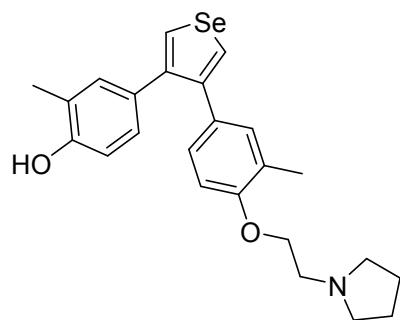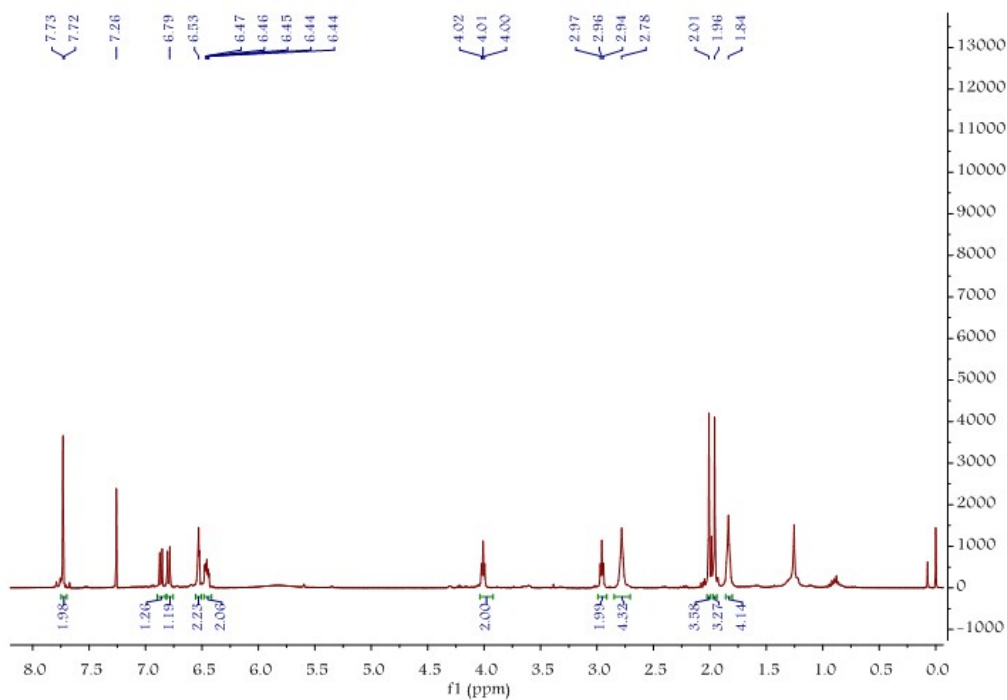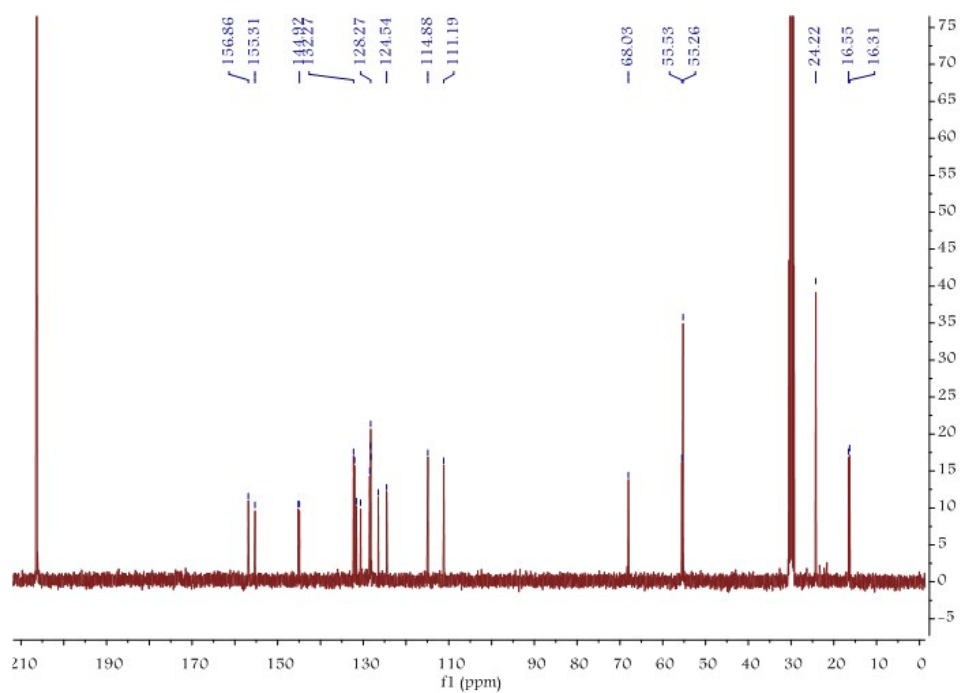

12f

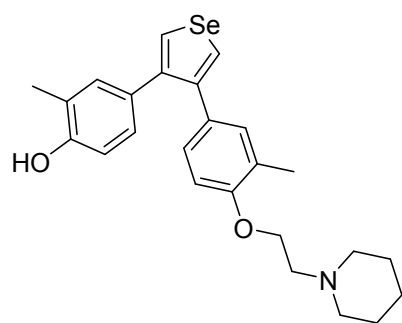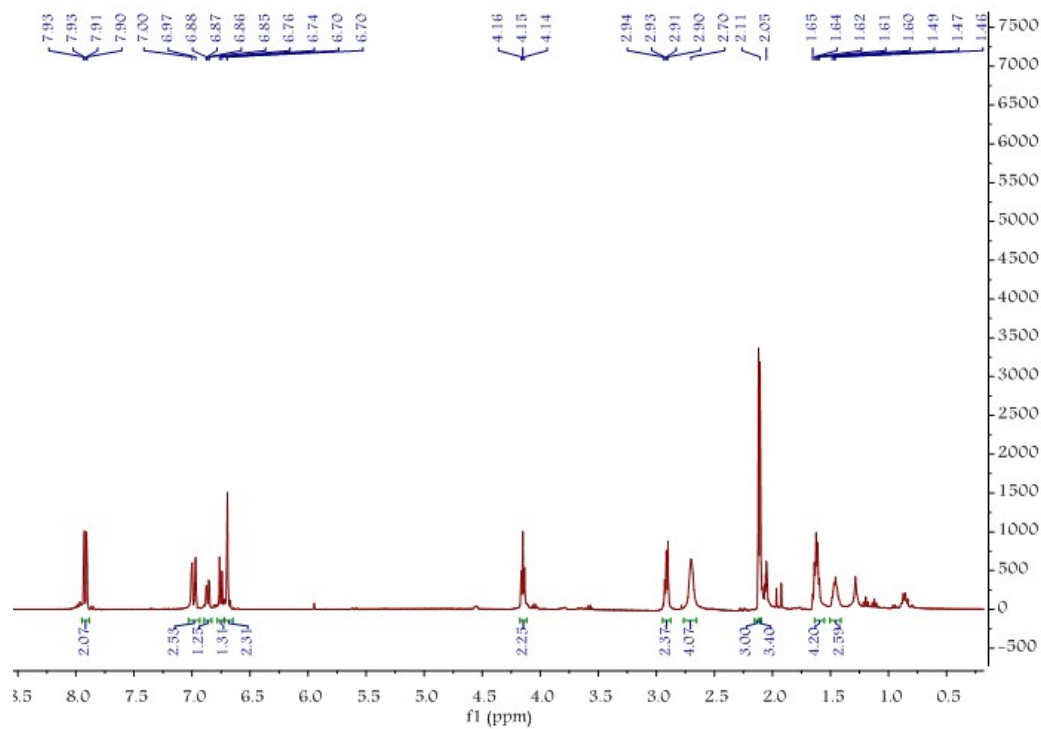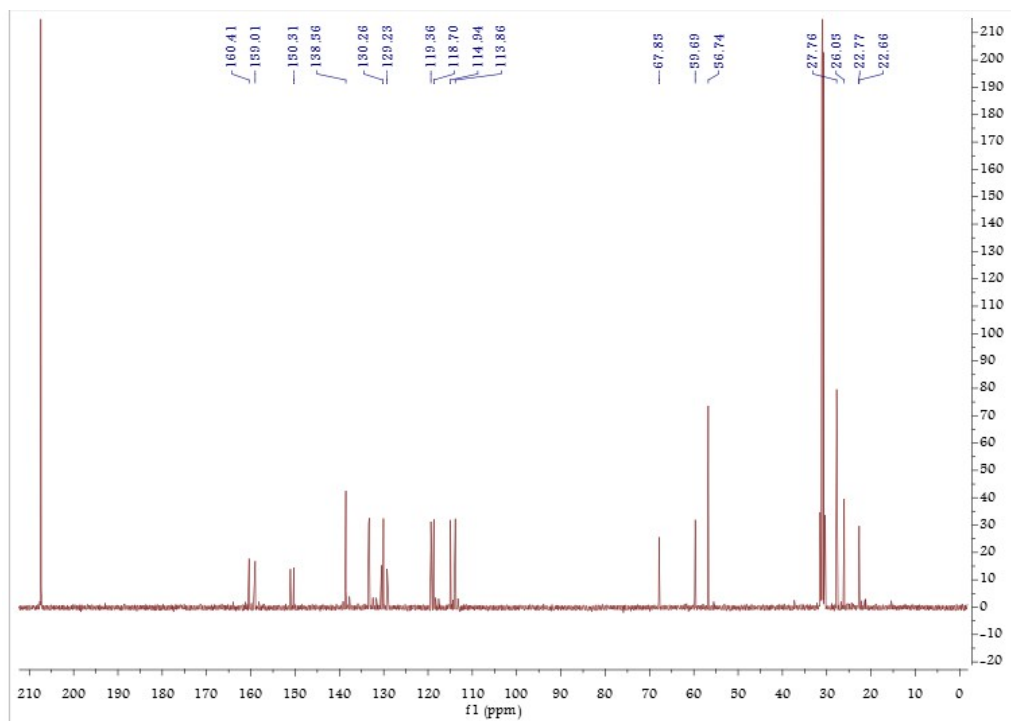



12g

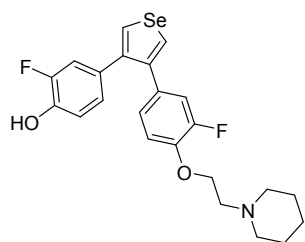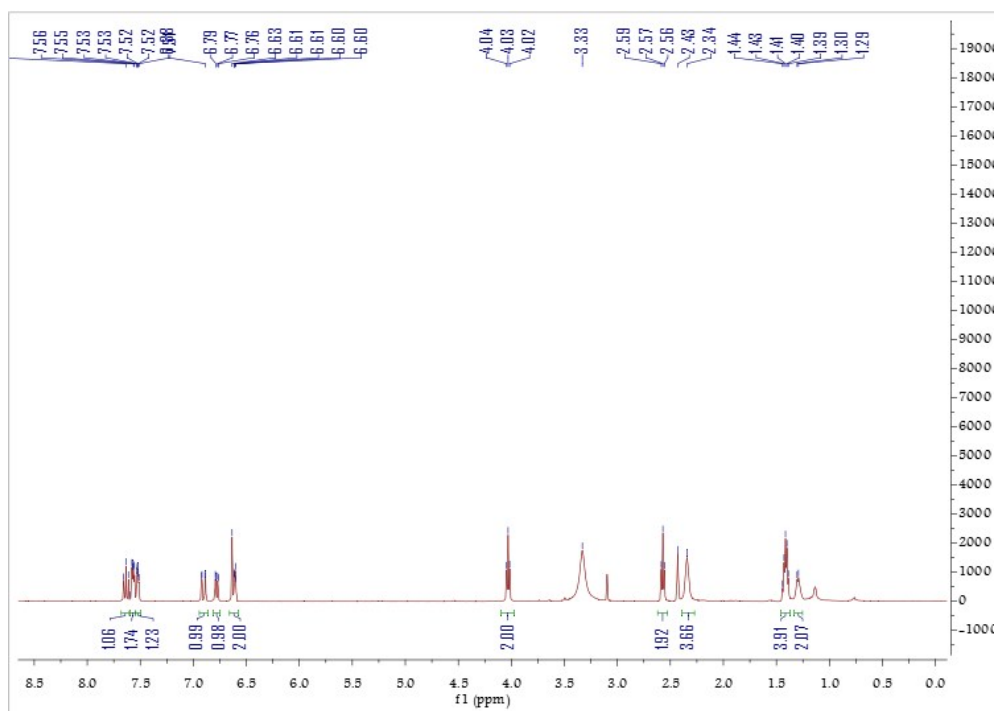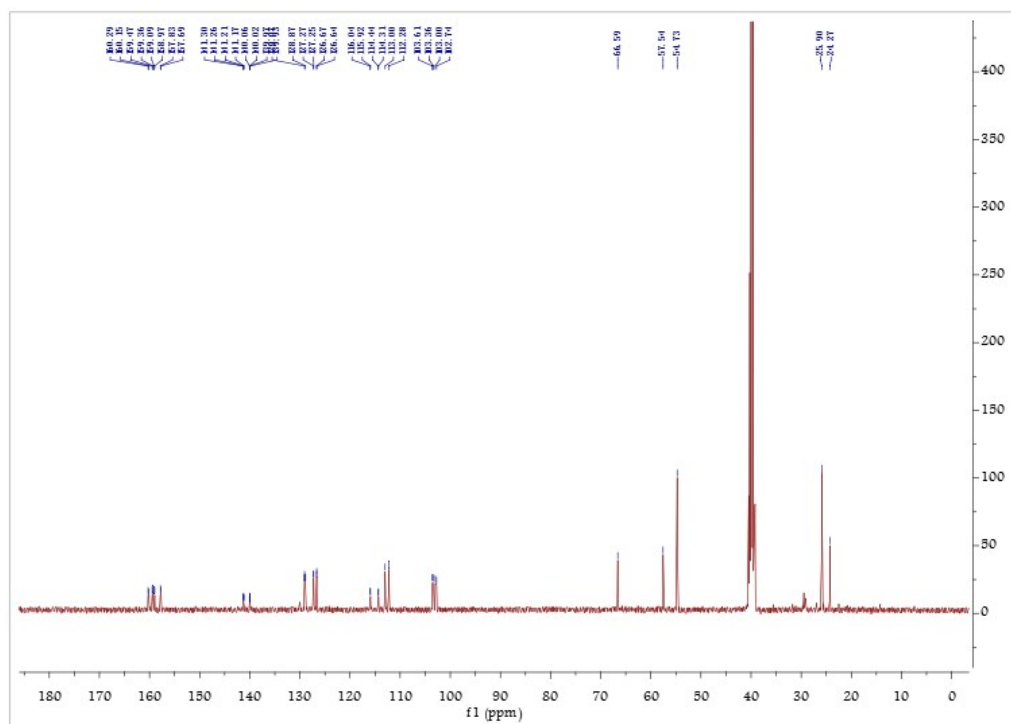

12h

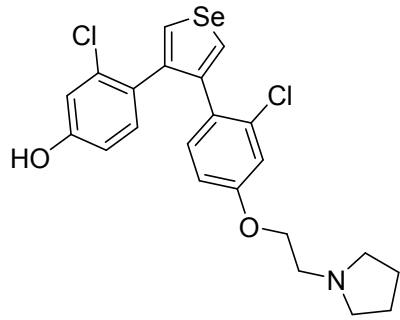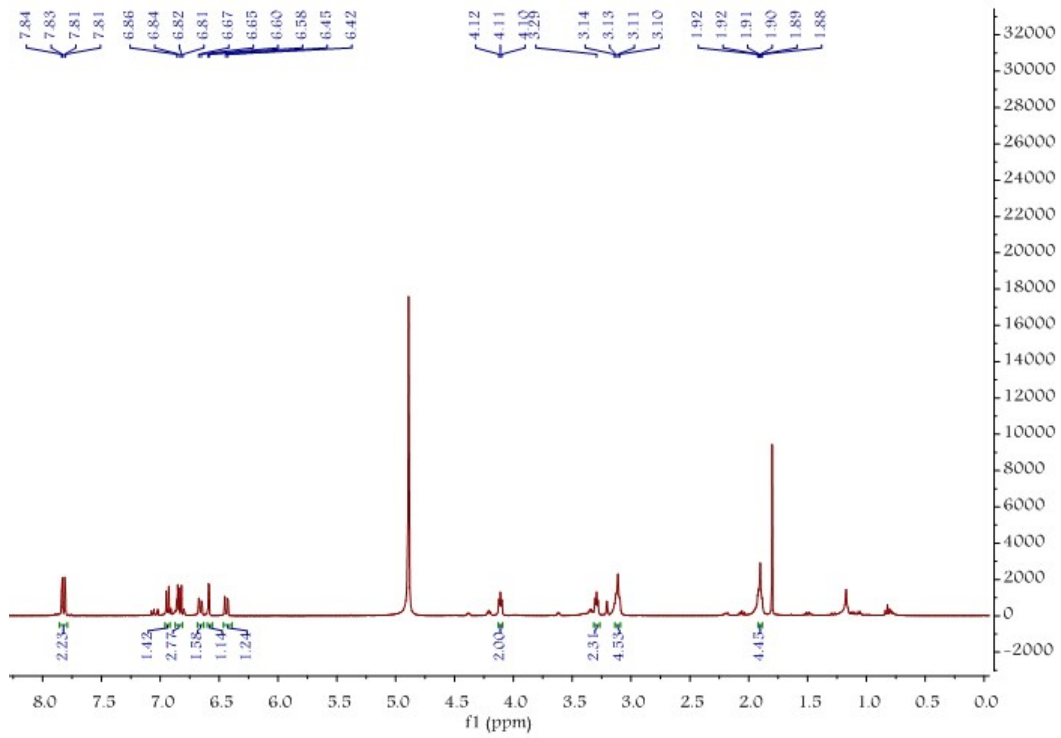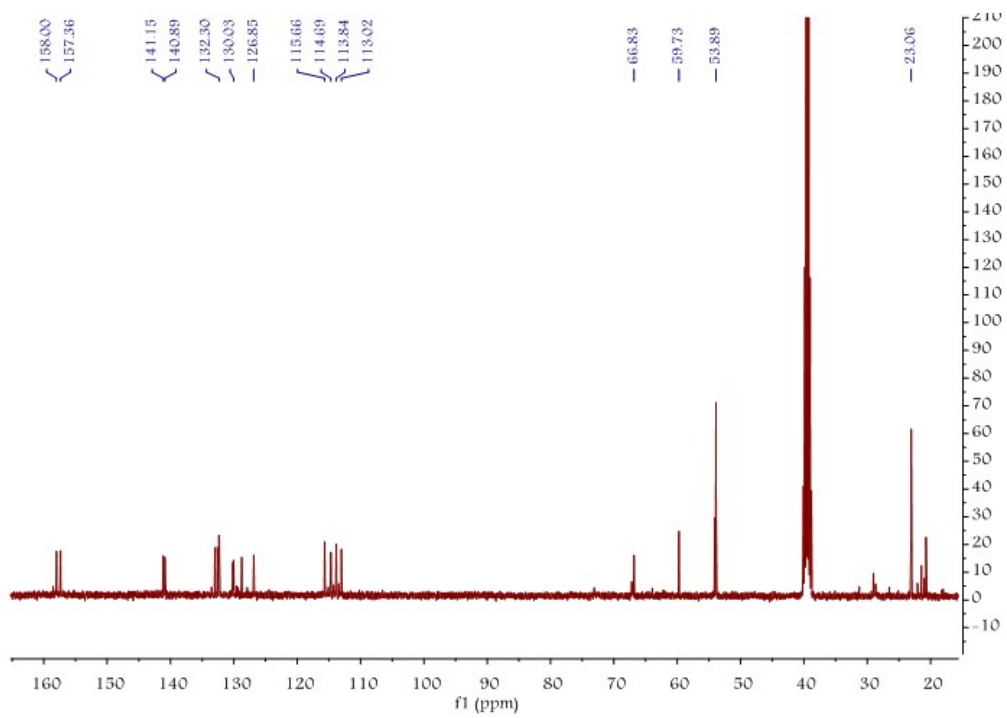

12i

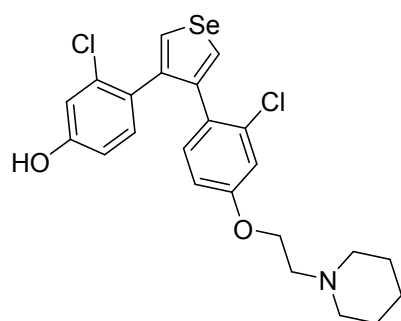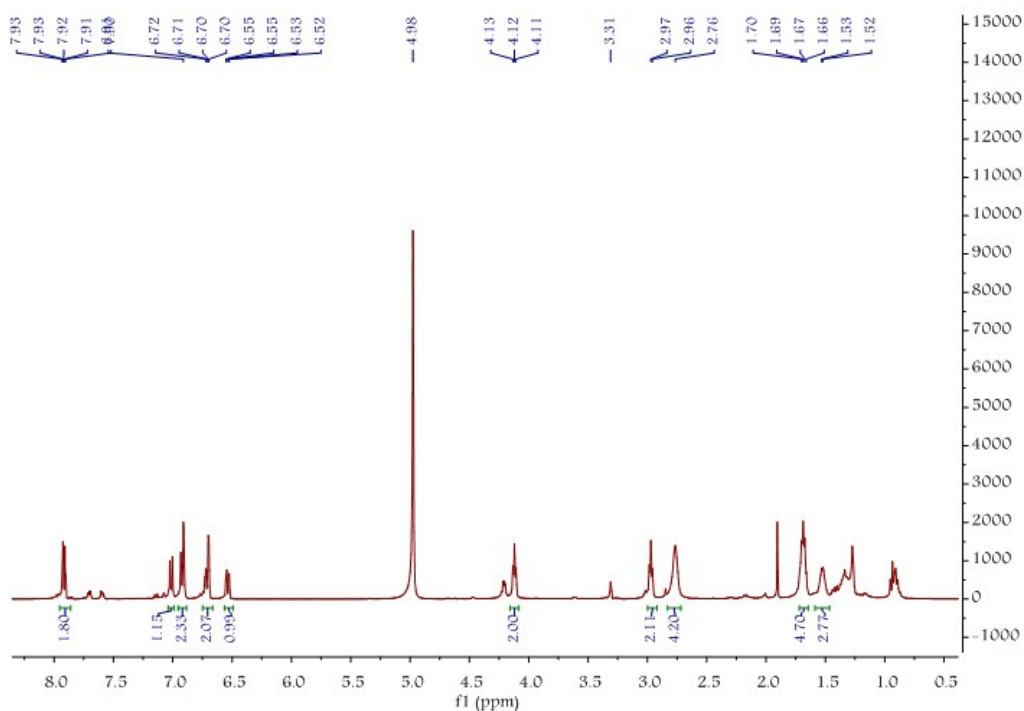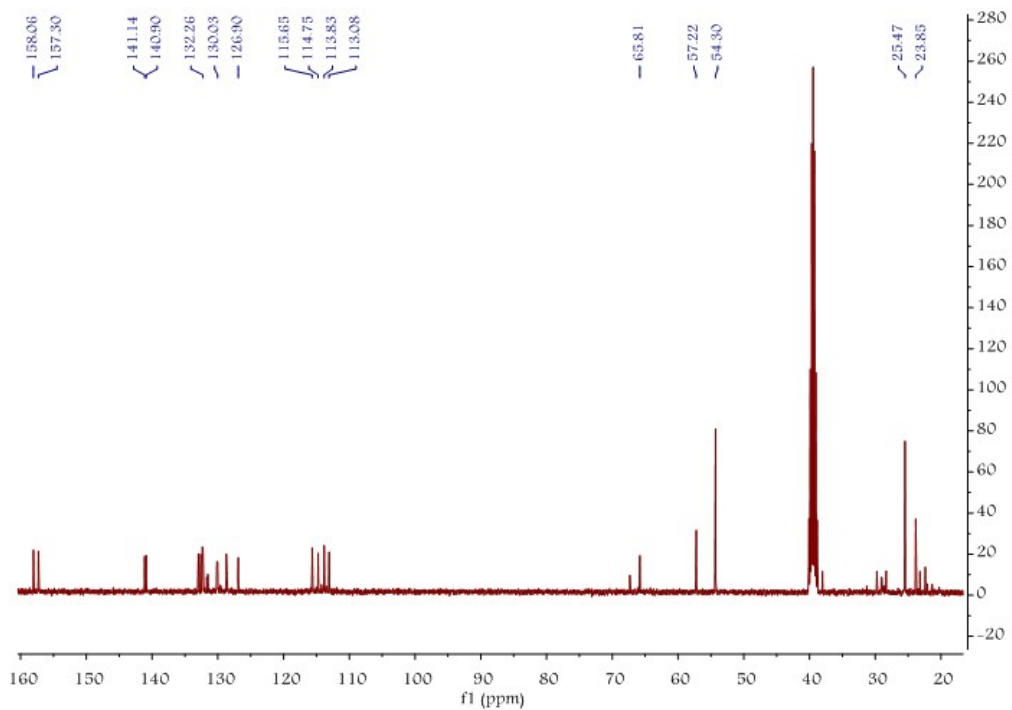

**14a**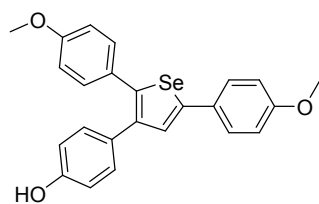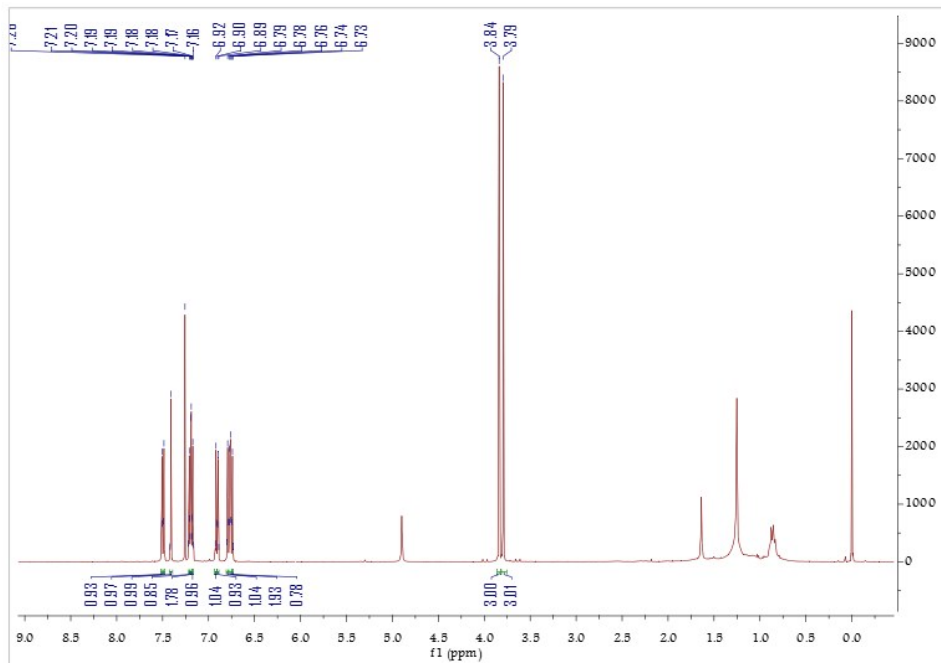**14b**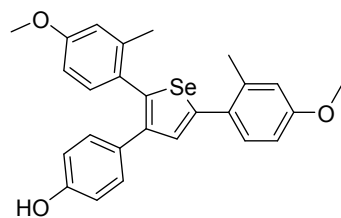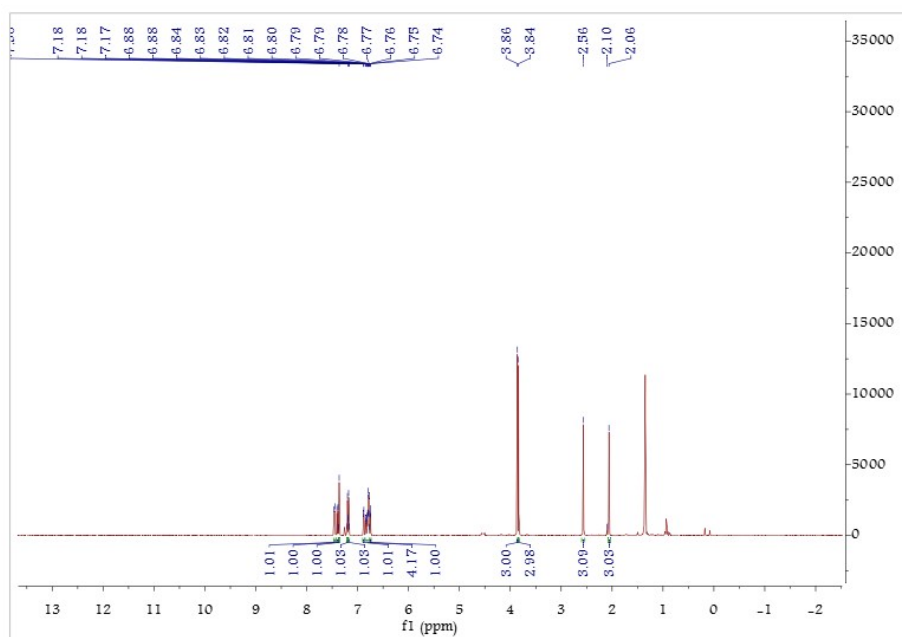

**16a**

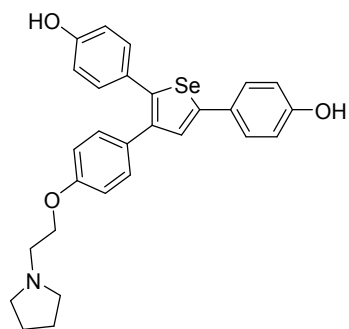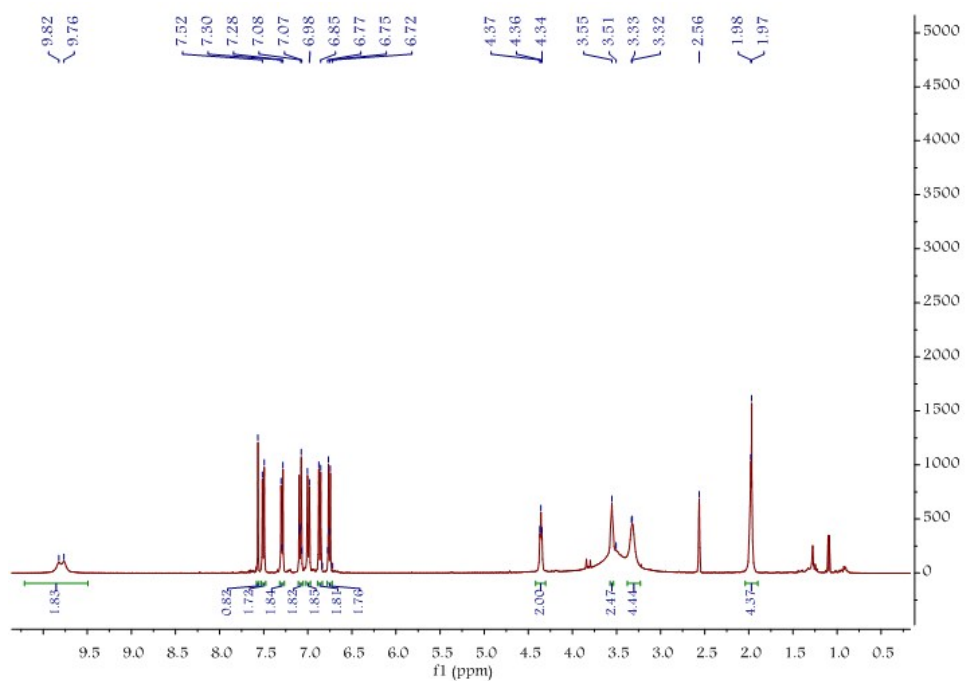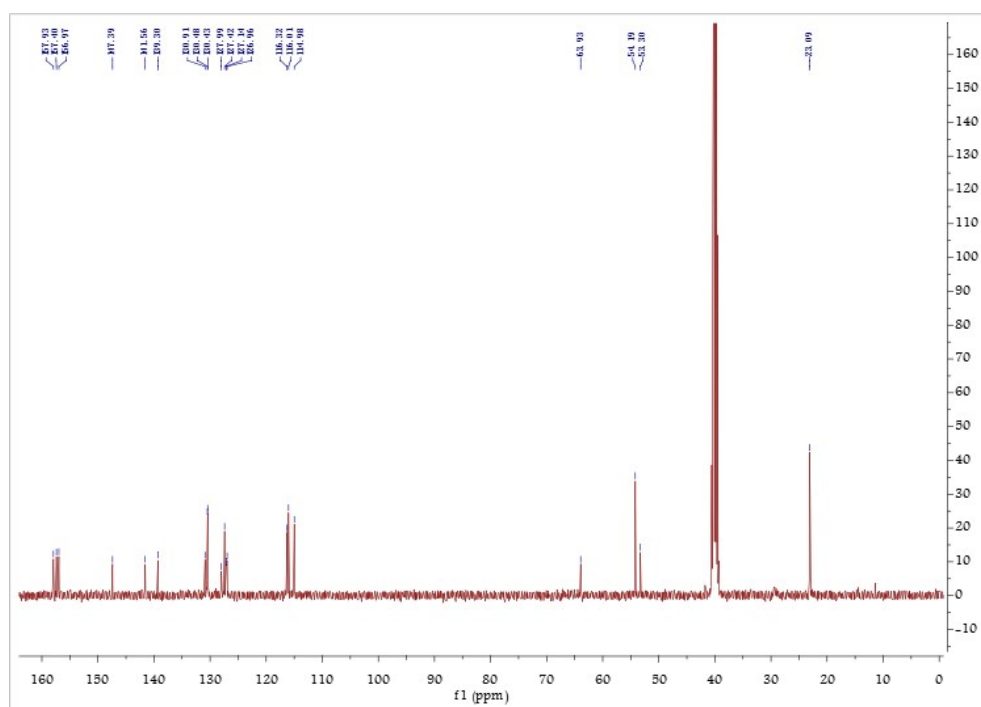

# 16b

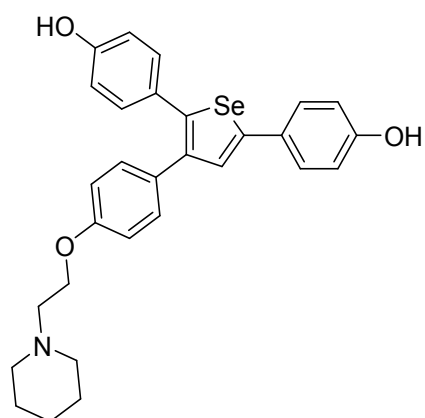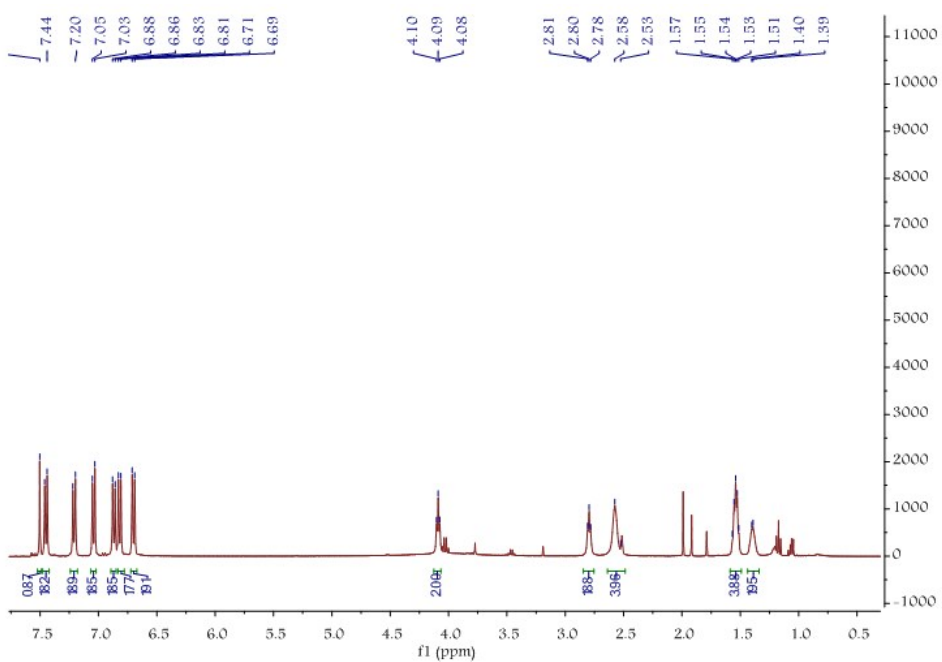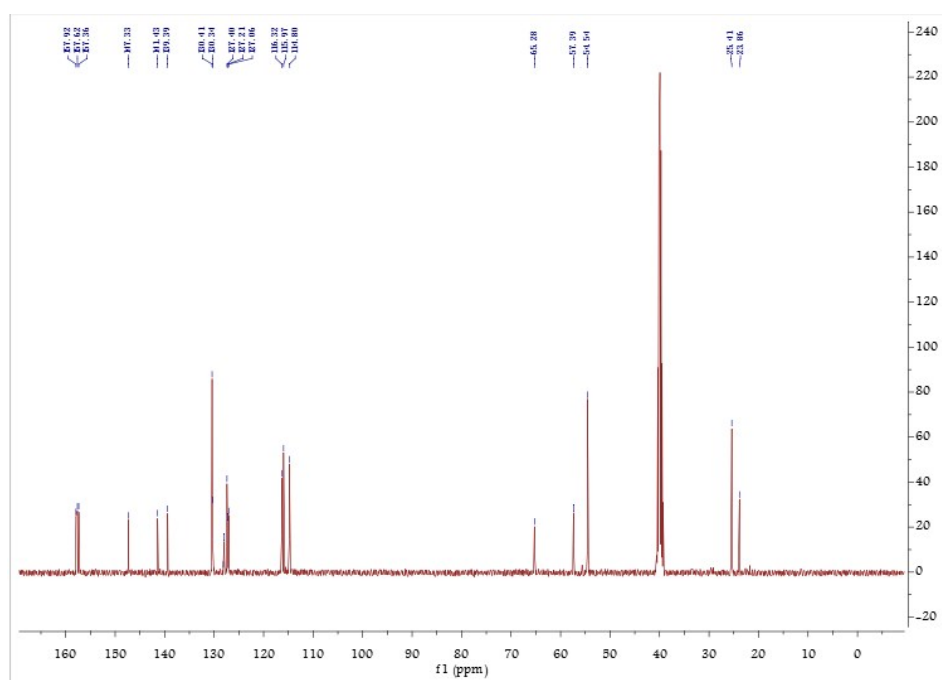

**16c**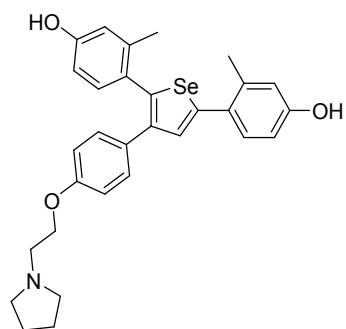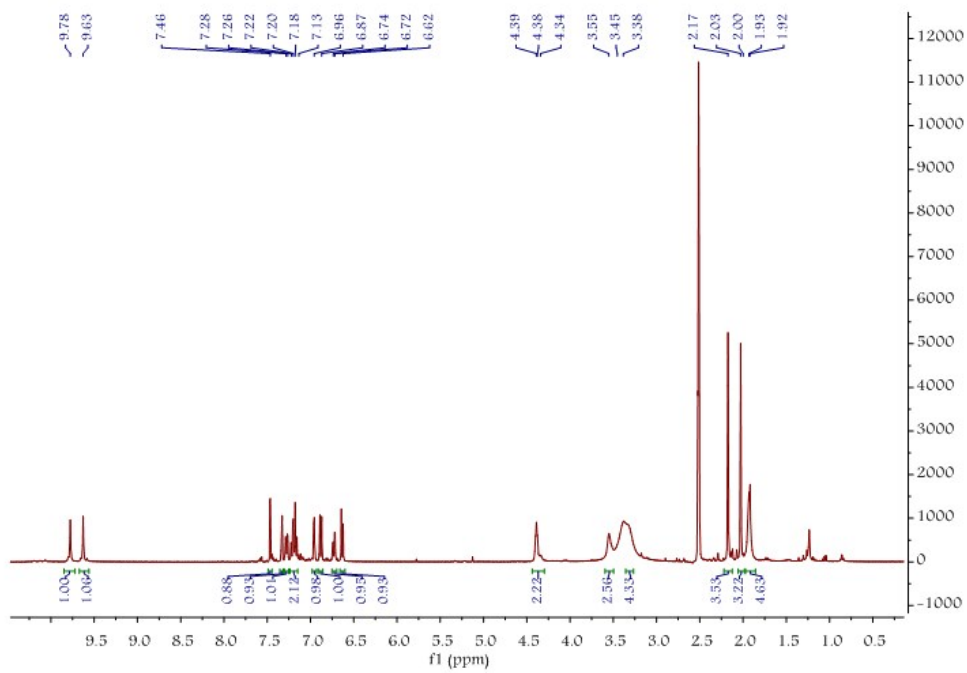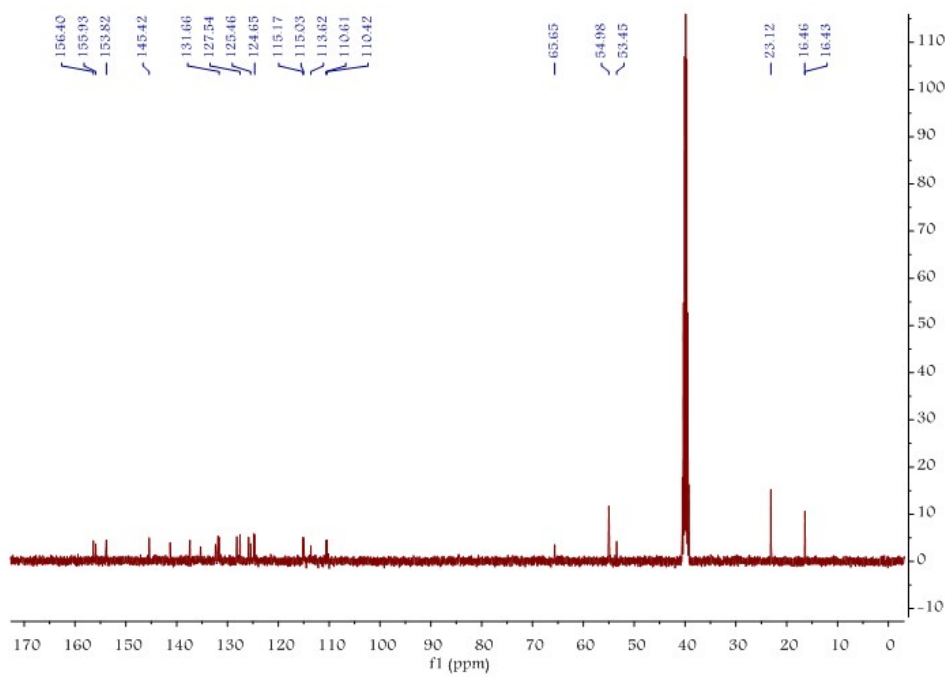

Supplement: c7md00163k1.pdf [file c7md00163k1.pdf]
